1 Harnessing the Power of Sex Differences: What a Difference Ten  
2 Years Did Not Make

3  
4

5 Rebecca K. Rechlin<sup>#1,5</sup>, Tallinn F.L. Splinter<sup>#2,5</sup>, Travis E. Hodges<sup>1,5</sup>, Arianne Y. Albert<sup>3,5</sup>,  
6 Liisa A.M. Galea<sup>\*4,5</sup>

7

8 <sup>1</sup>Department of Psychology, <sup>2</sup>Department of Biology, <sup>3</sup>Women's Health Research Institute of British  
9 Columbia, <sup>4</sup>Djavad Mowafaghian Centre for Brain Health, <sup>5</sup>Women's Health Research Cluster,  
10 University of British Columbia, Vancouver, BC, Canada

11

12

13 # both authors contributed equally

14

15

16 \*Address all correspondence to:  
17 L. A. M. Galea, PhD  
18 Djavad Mowafaghian Centre for Brain Health  
19 2215 Wesbrook Mall  
20 Vancouver, British Columbia  
21 V6T 1Z3, Canada  
22 E-mail: [liisa.galea@ubc.ca](mailto:liisa.galea@ubc.ca)

23

24

25

26

27 Highlights

28

29 68% of Neuroscience and Psychiatry papers reported the use of both sexes in 2019

30 Only 19% of studies in 2019 used sex consistently throughout the study analyses

31 Of the studies that used males and females, 59% did not include sex in the analyses

32 Only 5% of studies in 2019 used sex as a discovery variable in their analyses

33 Male only papers were 8.4 times more prevalent than female-only papers

34 **Abstract**

35 Sex differences exist in many neurological and psychiatric diseases. Mandates have been initiated  
36 across funding agencies for research to include males and females. What has been lacking in the  
37 literature is a detailed assessment of how sex is incorporated into the design (e.g. balanced design)  
38 and into the analyses (e.g. covariate). We surveyed papers in 2009 and 2019 across six journals in  
39 Neuroscience and Psychiatry. There was a 30% increase in the percentage of papers that included  
40 both sexes to 68% in 2019. Despite this increase, in 2019 only 19% of studies used an optimal  
41 design for discovery of possible sex differences and only 5% analyzed sex as a discovery variable.  
42 Here we show that little progress has been made in harnessing the power that sex differences can  
43 afford in research for discovery and therapeutic potential for neurological and psychiatric disease to  
44 improve the health of men, women and gender diverse individuals.

45

46

## 47 Introduction

48 The consideration of sex in published reports is essential to our understanding of disease and the  
49 biological mechanisms that contribute to the etiology, manifestation and treatment of disease<sup>1</sup>. The  
50 study of sex differences is critical to our understanding of precision medicine in finding effective  
51 treatments for disease. Sex differences exist in the prevalence and manifestation of a number of  
52 neurological and psychiatric diseases<sup>2,3</sup>. Females are more likely to be diagnosed with multiple  
53 sclerosis, major depressive disorder, and have a greater lifetime risk of Alzheimer's Disease  
54 compared to males, whereas males are more likely to be diagnosed with autism spectrum disorder,  
55 attention and hyperactivity disorder, and Parkinson's Disease<sup>1-4</sup>. Even in diseases that do not show  
56 strong sex differences in prevalence, age of disease onset or manifestation can be different  
57 between the sexes<sup>5,6</sup>. Perhaps more concerning, there are notable differences in time to diagnosis<sup>7</sup>,  
58 disease progression<sup>2,4</sup>, vaccine response<sup>8</sup> and treatment efficacy/drug response<sup>9</sup>. Harnessing the  
59 knowledge that males and females can differ on several disease-related outcomes will be fruitful in  
60 not only understanding disease but also in determining whether sex-specific risk factors for disease  
61 may warrant further attention. For example, the manifestation of cardiovascular disease can be  
62 different between the sexes, prompting calls for changes to the diagnostic guidelines for  
63 cardiovascular disease based on sex<sup>10</sup>. To make headway for precision medicine and most effective  
64 treatment and diagnoses, sex must be taken into consideration in the design and analyses of data.

65  
66 Many health disparities in treatment and diagnosis have been attributed to the lack of research in  
67 females and inclusion of women in clinical trials<sup>11,12</sup>. To increase the enrolment of women in clinical  
68 research, the United States Congress passed The Revitalization Act of 1993. This Act stated that  
69 women and minorities must be included as subjects in clinical trials funded by the National Institutes  
70 of Health (NIH). However, implementation of the requirement of women and minorities has not  
71 translated into analysis by sex or race/ethnicity<sup>13</sup>. The importance of sex consideration in research  
72 led the NIH to further mandate the inclusion of women and minorities in clinical research in 2001,  
73 and finally the addition of sex as a biological variable (SABV) in biomedical research in 2016<sup>14</sup>.  
74 However, this mandate, much like the one for clinical trials in 1993, did not include specifications as  
75 to the analysis of the data by sex<sup>15</sup> nor did it specify sample size requirements<sup>16</sup>. Other countries  
76 have notable differences in their recommendations, timeline and mandates. The Canadian Institutes  
77 of Health Research (CIHR) implemented Sex and Gender-Based Analysis (SGBA) in 2010 as a  
78 mandatory component and in 2019 into the scoring of grant. Horizon Europe (European  
79 Commission) has been working on policy changes since 2002 requiring the integration of sex and  
80 gender in research where relevant<sup>17</sup> and in 2020 Horizon Europe has indicated the need for  
81 inclusive intersectionality analyses of gender and sex in 2020 (Supplement Figure 1). Although  
82 prescriptive guidelines from funding agencies are lacking there are a number of reviews with  
83 suggestions on the appropriate incorporation of SABV and SGBA in the literature<sup>18-20</sup>. Despite the  
84 mandates and recommendations there have been implementation issues of the mandate as  
85 reviewers and authors of papers may be applying SABV and SGBA inconsistently perhaps given the  
86 lack of official guidelines<sup>21,22</sup>.

87  
88 The biomedical and clinical research community is beginning to make corrections for a long-  
89 standing bias of using males predominately in research. With the publication by Beery and Zucker<sup>23</sup>  
90 on the lack of sex inclusion in the literature in publications from 2009 it became clear that, although  
91 there was considerable variation by research field, the majority of studies were not using both  
92 sexes<sup>23</sup>. Studies in human populations were more likely to use both males and females across the  
93 ten disciplines examined compared to studies using animals<sup>23</sup>. A ten-year follow up was done  
94 demonstrating a 29% increase from 2009 in the inclusion of both sexes in research to 49% of  
95 articles in 2019, with Neuroscience having one of the largest increases in sex inclusion<sup>24</sup>. Even  
96 though a greater proportion of studies are including both sexes, there are issues in how these sexes

97 have been included, as approximately one third of sex-inclusive studies did not specify the sample  
98 size<sup>24</sup> and the large majority of studies that used males and females failed to analyze the data by  
99 sex in 2009<sup>23</sup>. Furthermore, there was an 8% decrease in the papers that used sex in their  
100 analyses<sup>24</sup> over the years as only one discipline (Pharmacology) improved in analyses of sex across  
101 the ten years. Furthermore, sex bias favouring males is still prevalent in neuroscience research<sup>24,25</sup>.  
102 In fact a study from Will and colleagues<sup>25</sup> indicated that the use of solely males in studies increased  
103 from 2010 to 2014, whereas the number of female studies remained at a constant low value (5% in  
104 Neuroscience). Thus, across the 10 years, studies indicate that although the sex omission rate is  
105 decreasing across disciplines, the use of sex in the analyses and the large differential in single-sex  
106 studies favoring males have not appreciably changed<sup>24</sup>.

107  
108 What has been lacking in the literature is a detailed assessment of how sex is reported in papers  
109 (whether the study design is balanced, sex used consistently throughout the studies within the  
110 papers) and how males and females are included in any analyses. Often in clinical studies, sex is  
111 used as a covariate which controls for sex by removing the linear variation due to sex from the  
112 analysis and does not inform on the effect of sex. Therefore, in the present study, we examined not  
113 only whether a statistical analysis was done in the studies but what type of analysis was done to  
114 determine whether sex was controlled for, via a covariate analyses, or explicitly examined as a  
115 discovery variable. We were also interested in how many papers used an experimental design that  
116 was optimal for discovery of potential sex differences (reporting sample size, relatively balanced  
117 design, sex used through throughout the experiments). We examined experimental design as an  
118 indication if the papers were addressing the possibility of noting sex differences in their data, with  
119 the understanding that not all papers would be designed to address sex differences.

120  
121 Given the prominent sex differences in neurological and psychiatry disorders, we chose to do a  
122 detailed examination of journals that targeted Neuroscience and Psychiatry. As the mandates for  
123 inclusion of males and females in biomedical research were in place in 2016, we examined two  
124 years over the ten-year period of 2009 to 2019 as was done by Woitowich and colleagues<sup>24</sup> and as  
125 these were dates before and after the recommendations from Horizon Europe, CIHR and NIH. We  
126 hypothesized that there would be an increase in the number of papers that included both sexes from  
127 2009 to 2019 in Neuroscience and Psychiatry papers, but also that there would be an increase in  
128 experimental design that was not optimized to examine sex as a biological variable. We also  
129 expected that most studies that analyzed sex as a factor would do so without using sex as a primary  
130 discovery variable across both disciplines, irrespective of year. Here we show that although the vast  
131 majority of papers include both sexes, only 19% include an optimal design for the discovery of  
132 possible sexes and only 5% included sex as a discovery variable in 2019.

## 133 134 **Methods**

135 We exhaustively examined research papers within three journals in Neuroscience and Psychiatry  
136 across two years. We chose journals based on the high ISI Clarivate rankings that published  
137 primary research papers. Three Neuroscience journals (*Nature Neuroscience*, *Neuron*, *Journal of*  
138 *Neuroscience*) and three Psychiatry journals (*Molecular Psychiatry*, *Biological Psychiatry*,  
139 *Neuropsychopharmacology*) were chosen. We assessed papers published in the year 2009 and in  
140 2019 to assess whether there has been an increase in the inclusion of sexes, improvements to  
141 experimental design and analyses to examine potential differences between the sexes.

### 142 **Studies included**

143 All primary research articles from 2009 and 2019 were analyzed if the papers used rats, mice,  
144 human subjects, or if fetal cells/cell lines were included. Cell lines included immortalised cell lines,  
145 primary cell culture, and stem cell derivatives. As sex of cells matters in a variety of outcomes<sup>26</sup>  
146 these studies were included. Brief communications, reviews, viewpoints etc. were excluded. This

147 resulted in a review of a total of 3191 publications (Figure 1). Assessments were done by two  
148 trained curators who had >99% interrater reliability (RKR, TFLS). When the categorization of  
149 analyses within the paper (see below) was questioned, these were confirmed by AYA, a  
150 biostatistician - who was consulted on 0.5% of the papers reviewed or 16 times in total.  
151  
152

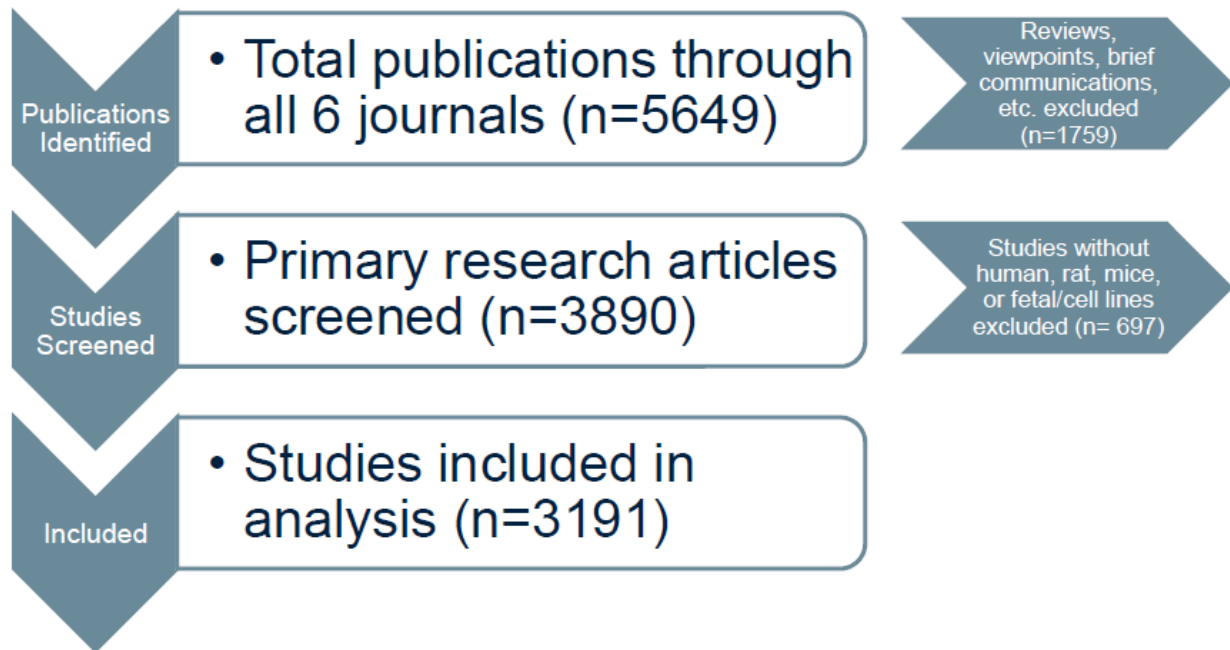

153  
154 **Figure 1.** Inclusion of studies from all 6 journals. Reviews, viewpoints, brief communications and  
155 any other non- primary research articles were excluded. A total of 2456 studies did not match the  
156 inclusion criteria and were excluded. Only primary research articles containing human, rat, mice  
157 or fetal/cell lines were analyzed further (n=3191).  
158

### 159 ***Categorization of Inclusion of males and females and Sex-Based Analyses***

160 Studies that matched the inclusion criteria were first examined to determine whether they included  
161 males and females, males only, females only, did not report sex, or were inconsistent throughout  
162 (i.e. used males in one experiment, and both sexes in another). If the study looked at both sexes,  
163 we determined whether there was balanced design (an equal ratio of male to female subjects). An  
164 unbalanced design was defined as one sex accounting for more than 60% of the total sample size.  
165

166 Studies that included both sexes were then examined to determine whether they included any form  
167 of analysis using sex as a factor. Studies that did any type of sex analysis were then broken down  
168 into six categories: main effect of sex only, complete analysis by sex, sex as a covariate, analyzed  
169 sexes separately, statistics not given, and “mixed analysis”. Studies that only tested for a main  
170 effect of sex (examining differences between males and females on the dependent variable of  
171 interest) without regard to whether there were any interactions with other independent variables or  
172 any other further analyses were classified as “main effect”. An interaction effect examines the effect  
173 of sex along with other independent variables (e.g. treatment, genotype, disease). A significant  
174 interaction will indicate that the effect on the dependent variable (e.g. neurogenesis) varied across  
175 two independent variables, such as neurogenesis levels would differ by drug treatment based on the  
176 sex of the subject. Studies which analyzed the main effects and interaction effects of sex were  
177 classified as “complete analysis by sex”. Studies that used sex a covariate effectively removes the  
178 linear association of the variable sex from the dependent variables of interest. A covariate is a way



179 of eliminating the variability due to sex, not analyzing for sex, and in doing so covariates are often  
180 referred to as ‘nuisance’ or ‘confound’ variables. Some papers stated that there was or was not an  
181 effect of sex but provided no statistical evidence to back up the statement and these papers were  
182 classified as “statistics not given”. A “mixed analysis” category was also included which consisted of  
183 studies which were inconsistent in their analyses throughout the study (i.e. analyzed sex in one  
184 experiment but did not analyze by sex in subsequent experiments). Any studies that used both  
185 sexes but did not mention any effects or analyzes by sex and therefore did not fit into any of these  
186 “analyzed” categories were classified as “not analyzed”. When sex information and analyses were  
187 only reported in the supplementary section of the studies, these studies were put into a  
188 “supplementary only” category. When a study analyzed by using sex as a discovery variable this  
189 meant that sex was used as a predictor/between-subject variable in the analysis and analysed for  
190 main and interaction effects, we refer to this as an optimal analysis for possible discovery of sex  
191 differences.

192  
193 When a study employed a relatively equal sample size of both males and females and used them  
194 consistently throughout the study we refer to this as an optimal design for discovery of sex  
195 differences. Our reasoning behind this is that because unequal sample sizes affect power (the  
196 chance that the study will detect a sex difference if a sex difference exists or rejecting the null  
197 hypothesis when it is false) and if unequal sample sizes are paired with heterogeneity of variance  
198 this will affect the robustness of parametric tests<sup>27</sup>. This underscores that relatively equal sample  
199 sizes are necessary for an optimal design for discovery of possible sex differences. Modelling of  
200 sample sizes needed for discovery of sex differences suggest that when an interaction is present  
201 (interaction is when factor A has a different effect dependent on sex), high power can exist  
202 depending on the effect size of the interaction. For example, using a factorial ANOVA, high power  
203 (i.e.  $\beta > 0.8$ ) is obtained with relatively small sample sizes (n=5 per group) when the interaction  
204 shows either a reverse effect between sexes or no effect in one sex versus the other<sup>21,28</sup>. Larger  
205 samples sizes are needed when an interaction exists due to half of the effect in one sex over the  
206 other sex ( $\beta > 0.8$ , n=25 per group)<sup>21</sup>. Indeed the use of sex as a discovery variable can lead to  
207 increased statistical power, particularly when there are interaction effects indicating the sexes show  
208 opposing effects of a treatment/intervention on the variable of interest<sup>21,28</sup>. Thus, it is important that  
209 researchers not just consider that sex differences will result in overall (main) effects but that they  
210 may result in interaction effects (when a treatment has different effects in one sex versus another).

211  
212 We refer to these designs and analyses as optimal for discovery of possible sex differences, as it  
213 would be impossible to detect any sex differences if the data were not analyzed by sex and if the  
214 sexes were not used consistently or the sample size employed was not advantageous to the  
215 discovery of possible sex differences. By using the word optimal we do not mean to imply that the  
216 studies were not optimal in the design for the particular experiment but that the design or analyses  
217 were not optimal for the discovery of any possible sex differences.

218  
219 The country/region of origin of each paper was also examined. We included six categories for the  
220 region: USA, Canada, Europe (EU), the United Kingdom (UK), Asia (all countries in the continent of  
221 Asia), and combination/other. Combination/other refers to studies done by researchers from multiple  
222 countries, or from a country/region other than those previously mentioned.

223  
224 We also examined the sex/gender of the first and last author of each paper. We determined author  
225 sex/gender by searching for the author online and looking for descriptions of them. When this was  
226 not possible we used the website genderize.io, a database which determines the sex/gender of a  
227 first name and provides a certainty factor associated with the name.

228

229 **Statistical Analyses:** As the number of papers published differed by journal and year (Table 1)  
230 from a low of 55 (2019, *Molecular Psychiatry*) to a high of 1067 (2009, *Journal of Neuroscience*), we  
231 used proportional variables within each analysis. Data were reported and analyzed as percentages  
232 of total papers per journal per year. We used proportional data to run general linear analysis of  
233 variance (ANOVA) across year (2009, 2019) and discipline (Neuroscience, Psychiatry) with our  
234 dependent variables of interest. We also used method of analyses (complete analysis by sex,  
235 covariate, main effect, statistics not given, analyzed separately, mixed), single sex studies (male,  
236 female) and country of origin (USA, Canada, UK, EU, Asia, Combo) as within-subjects factors. Post-  
237 hoc comparisons used Newman-Keuls comparisons. Significance was set at  $\alpha=0.05$  and effect  
238 sizes are provided. Effect sizes using  $n_p^2$  or Cohen's d are provided. All analyses were tested for  
239 assumptions of ANOVA using Bartlett's test of homogeneity of variance and Kolmogorov-Smirnov  
240 test for normality. None of the variables violated assumptions except for male only papers and these  
241 data were transformed prior to analysis.

242 **Data Availability:** Source data analyzed during the current study are available in the Dataverse  
243 repository, <https://doi.org/10.5683/SP3/VDH895>.

244

| <b>Journal</b>               | <b>Number of Papers</b> |
|------------------------------|-------------------------|
| Neuron 2009                  | 159                     |
| Neuron 2019                  | 207                     |
| Nature Neuroscience 2009     | 118                     |
| Nature Neuroscience 2019     | 143                     |
| Journal of Neuroscience 2009 | 1067                    |
| Journal of Neuroscience 2019 | 588                     |
| Molecular Psychiatry 2009    | 70                      |
| Molecular Psychiatry 2019    | 55                      |
| Biological Psychiatry 2009   | 245                     |
| Biological Psychiatry 2019   | 136                     |
| Neuropsychopharmacology 2009 | 209                     |
| Neuropsychopharmacology 2019 | 196                     |
| <b>Total</b>                 | <b>3193</b>             |

245

246 Table 1. The number of papers examined that were published in 2009 or 2019 in the six journals  
247 investigated.

248

## 249 RESULTS

250

251 ***Most Neuroscience papers used rodents, whereas most Psychiatry papers used human***  
252 ***subjects.***

253 We categorized the papers reviewed by subject species or tissue (Figure 2). Although the majority  
254 of studies in Psychiatry journals used human subjects this was closely followed by rodent studies  
255 whereas the majority of studies in Neuroscience journals used rodents which was three times higher  
256 than studies using human subjects. Neuroscience published three times more studies using cell  
257 lines than Psychiatry.

258



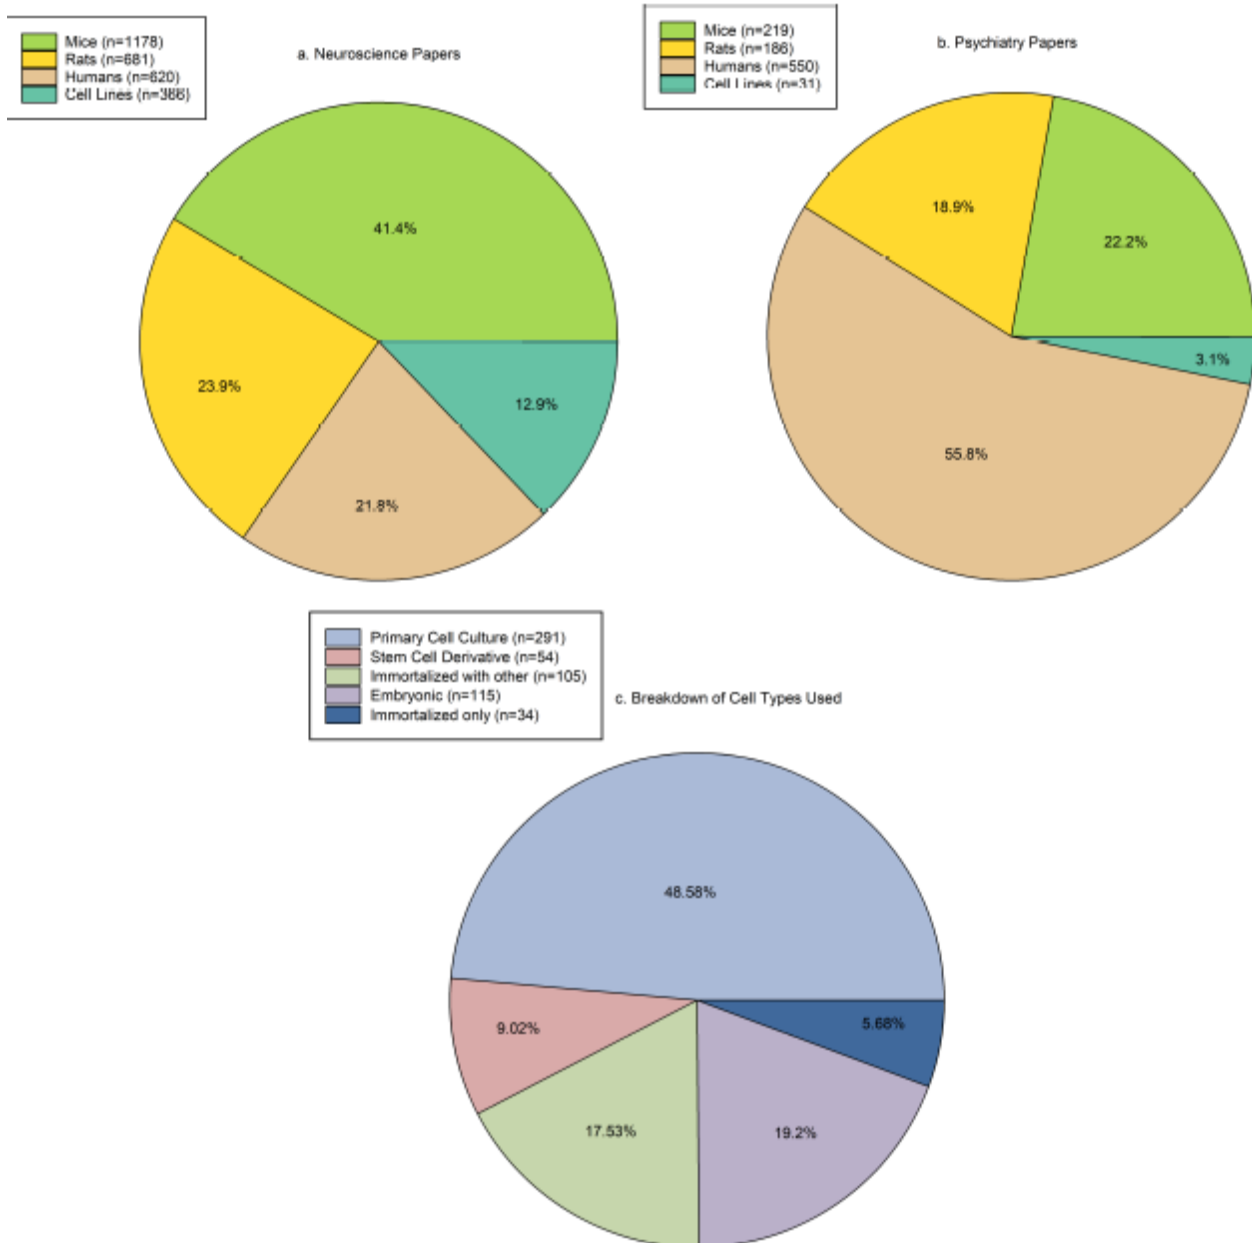

259  
260  
261  
262  
263  
264  
265  
266  
267  
268

**Figure 2.** Reported species model used from each study. (a) Rodents (mice (n=1178) and rats (n=681)) were the most common species by studies in the Neuroscience discipline. (b) Human subjects (n=550) were the most common species used in Psychiatry studies. n=sample size Sample sizes are the number of papers that used the model systems and will total to greater than 3191 as some studies used two or more model systems. Of the studies that used cell lines, the majority used primary cell culture (n=291). The other types of cell line used were stem cell derivatives (n=54), immortalized with other cell types (n=105), embryonic (n=115), and immortalized only (n=34). Sample sizes will add up to greater than 397 as some studies used two or more cell lines in their papers. (c) Breakdown of type of cell line used. The largest proportion of studies used primary cell lines. Sample sizes are the number of papers and will add up to greater than 397 as some studies used two or more cell lines in their papers. We relied on the paper to distinguish whether cell lines were conducted in males or females, regardless of the cell line used.

## 269 **Neuroscience papers including males and females doubled from 2009 to 2019**

270 Each paper was examined to determine whether any part of the paper mentioned the use of both  
271 sexes in the study, even if the data were not shown. Across all years and disciplines, the majority of  
272 all papers mentioned using both sexes (52.93%), which increased by 30% over the ten years (to  
273 68.01% in 2019). Overall, just less than half (45.28%, n=962) of all Neuroscience publications  
274 mentioned using both sexes, while 60.58% (n=377) of all Psychiatry publications mentioned using  
275 both sexes. Neuroscience publications using both sexes significantly increased over the ten years  
276 by 50% to an astonishing 70.39% in 2019 ( $p=0.003$ ; Cohen's  $d=9.154$ ). Psychiatry publications

277 increased by just 10% to 65% in 2019 ( $p=0.32$ ; interaction effect of year by discipline:  $F(1,8)=8.844$ ,  
278  $p=0.017$ ,  $n_p^2= 0.525$  ; Figure 3a). There were also significant main effects of year ( $F(1,8)=20.02$ ,  
279  $p=0.002$ ,  $n_p^2= 0.714$ ) and discipline ( $F(1,8)=5.14$ ,  $p=0.05$ ,  $n_p^2= 0.39$ ).

280 However, the papers that included males and females included studies that mentioned the inclusion  
281 of both sexes but did not show these data. We then calculated a more rigorous count of the  
282 inclusion of sexes by including only studies that examined sexes in a balanced design and  
283 consistently used males and females throughout all the experiments in the paper. This more  
284 stringent criteria of inclusion of both sexes, resulted in a drop to below 20% of studies that used sex  
285 as an optimal design for discovery of possible sex differences (16.54% overall, 14.15% in 2009 to  
286 18.93% in 2019). Psychiatry publications were twice more likely to use both sexes compared to  
287 Neuroscience publications (main effect of discipline,  $F(1,8)=11.19$ ,  $p=0.01$ ,  $n_p^2= 0.583$ ). There was  
288 no main effect of year ( $F(1,8)=2.715$ ,  $p=0.137$ ,  $n_p^2= 0.253$ ) or interaction ( $F(1,8)=0.532$ ,  $p=0.48$ ,  $n_p^2=$   
289  $0.062$ ; Figure 3b).

290 The percentage of papers failing to disclose sex fell dramatically over the years, with the greatest  
291 change seen in Neuroscience as only 3% of papers omitted sex in 2019 ( $p<0.0001$ , Cohen's  
292  $d=7.73$ ) as there was no significant change in Psychiatry papers across the years ( $p=0.63$ , Cohen's  
293  $d=0.43$ ); discipline by year interaction ( $F(1,8)=45.21$ ,  $p<0.001$ ,  $n_p^2= 0.849$ , Figure 3c). There were  
294 also main effects (discipline:  $F(1,8)=34.97$ ,  $p<0.001$ ,  $n_p^2= 0.813$ ; year:  $F(1,8)=55.2$ ,  $p<0.001$ ,  $n_p^2=$   
295  $0.873$ ).

296

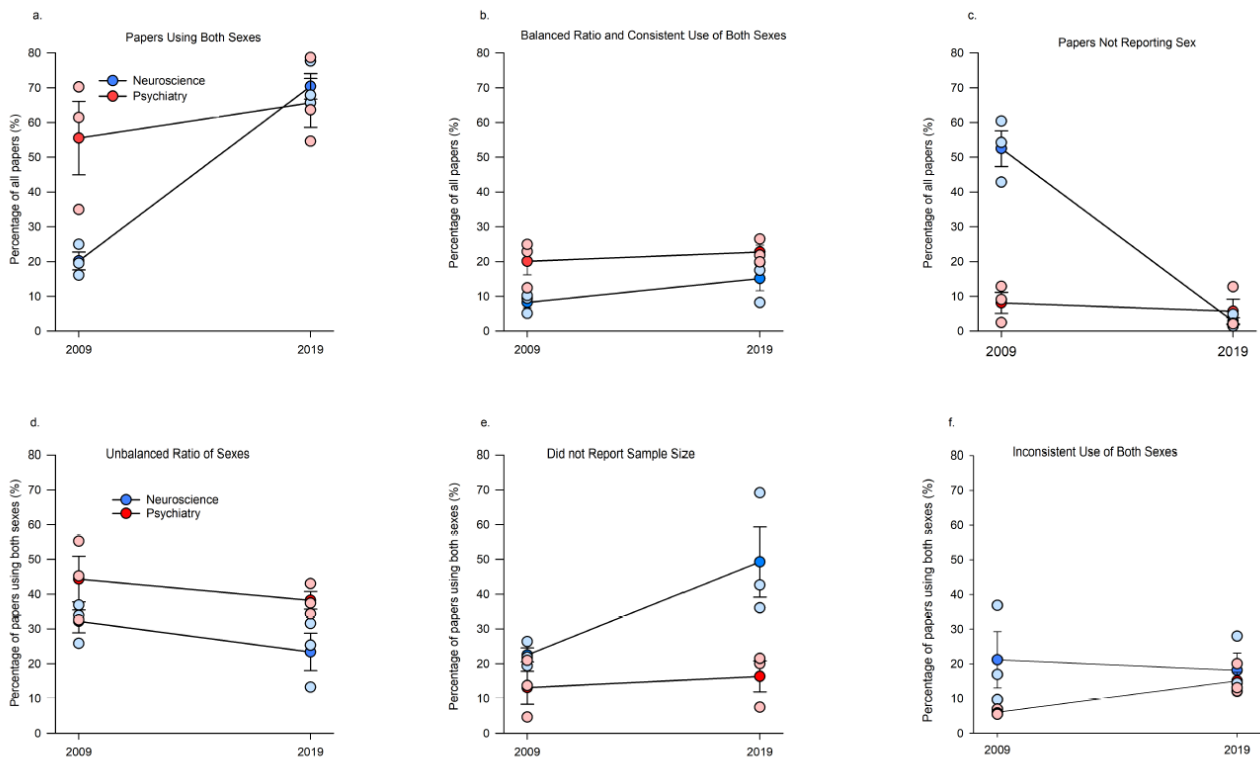

297

298 **Figure 3.** The percentage of papers including both sexes (a-c) and the breakdown of how studies that reported using both sexes are using  
 299 them (d-f). (a) Percentage of papers using both sexes in any aspect of the study, regardless of consistency or balanced ratios. The  
 300 percentage of papers including males and females increased significantly for Neuroscience  $p=0.003$  but not Psychiatry papers ( $p=0.32$ ).  
 301 Number of papers: Neuroscience 2009  $n=316$ , 2019  $n=646$ ; Psychiatry 2009  $n=288$ , 2019  $n=249$ . (b) Percentage of papers using both  
 302 sexes consistently throughout the study with balanced ratios of the sexes. Number of papers: Neuroscience 2009  $n=130$ , 2019  $n=158$ ;  
 303 Psychiatry 2009  $n=103$ , 2019  $n=87$ . (c) Percentage of papers not reporting sex (sex omission) was decreased in the Neuroscience  
 304 discipline  $p<0.001$ . Number of papers: Neuroscience 2009  $n=617$ , 2019  $n=25$ ; Psychiatry 2009  $n=34$ , 2019  $n=14$ . (d) Unbalanced design  
 305 (i.e. more than 60% of the subjects were one sex) was 34.52% of all papers including both sexes (number of papers: Neuroscience  
 306 2009  $n=105$ , 2019  $n=154$ ; Psychiatry 2009  $n=142$ , 2019  $n=98$ ) (e) Papers using both sexes but not disclosing sample sizes, are  
 307 increasing in Neuroscience papers but not Psychiatry papers. (number of papers: Neuroscience 2009  $n=69$ , 2019  $n=304$ ; Psychiatry  
 308 2009  $n=27$ , 2019  $n=38$ ). (f) Inconsistent use of sex (i.e. using a balanced ratio in one aspect of the design, and an unbalanced ratio  
 309 or one sex only in another aspect) accounted for 15.11% of studies that used males and females (number of papers: Neuroscience  
 310 2009  $n=55$ , 2019  $n=102$ ; Psychiatry 2009  $n=17$ , 2019  $n=34$ ). Means  $\pm$  standard error of the mean.

311

### 312 **Most studies did not use an optimal design to discover sex differences**

313

314 Although the percentage of studies using both sexes has increased, there are changes in the way  
 315 that sex is being reported or used. What is driving the large discrepancy between the majority of all  
 316 studies using both sexes but less than 20% of studies using sex optimally for discovery of possible  
 317 sex differences? There were several scenarios we encountered in studies that used males and  
 318 females which included 1) sample sizes were not given (25%), 2) the proportions of the sexes were  
 319 dramatically different (34%), or 3) the use of sex was not used consistently throughout the studies  
 320 (15%, Figure 3d-f).

321

322 Of the papers that used both sexes, just over a third of studies did not use a balanced design, with  
 323 more Psychiatry papers employing this practice (main effect of discipline:  $F(1,8)=8.189$ ,  $p=0.021$ ,  
 324  $\eta_p^2=0.505$ , Figure 3d). There were no other effects (all  $p$ 's  $> 0.153$ ).

325

326 Just over a quarter of the papers that used both sexes did not identify sample sizes, which has  
 327 effectively doubled across the years to almost a third of all studies that used both sexes in 2019  
 328 (32.79%) and this practice is twice as high in Neuroscience (35.87%) compared to Psychiatry  
 329 (14.71%; Figure 3e; main effects: year ( $F(1,8)=6.06$ ,  $p=0.039$ ,  $\eta_p^2=0.431$ ) discipline: ( $F(1,8)=12.08$ ,

330  $p=0.008$ ,  $\eta_p^2= 0.602$ ). Inspection of the graph indicates the increase across years is driven by  
331 Neuroscience as the percentage more than doubled in 2019 (49.25% from 22.49%; *a priori*  $p=0.014$ ,  
332 Cohen's  $d=2.16$ ), whereas the percentage did not significantly change across the ten years in  
333 Psychiatry (from 13.09% to 16.32%,  $p=0.72$ ; interaction ( $F(1,8)=3.73$ ,  $p=0.089$ ,  $\eta_p^2= 0.318$ ).

334

335 The percentage of inconsistent use of sexes across the studies within a paper was 15.11% of all  
336 those that indicated they used both sexes. This percentage did not significantly change by year or  
337 by discipline (Figure 3f;  $p$ 's  $>0.10$ ).

338

339 Few (4%) papers referred to the sex effects in the supplemental section and there were no  
340 significant differences across year or discipline ( $p$ 's  $>0.28$ ; Table 2).

341

| <b>Discipline</b> | <b>Mean <math>\pm</math> SEM 2009</b> | <b>Mean <math>\pm</math> SEM 2019</b> |
|-------------------|---------------------------------------|---------------------------------------|
| Neuroscience      | 3.9 $\pm$ 2.0 (n=3)                   | 4.2 $\pm$ 4.2 (n=14)                  |
| Psychiatry        | 1.2 $\pm$ 1.2 (n=6)                   | 6.9 $\pm$ 2.1 (n=16)                  |

342 Table 2. The proportional percent of times that male and female data was found in the supplemental  
343 section. There were no significant differences by year or discipline. Overall four percent of papers  
344 referred to data on males and females in the supplemental section, not in the main body of the  
345 paper. n=Number of papers.

346

#### 347 ***Male-only papers disproportionately outnumbered female-only papers***

348

349 Male-only papers were 9 times more common than female-only papers, regardless of year (main  
350 effect of sex:  $F(1,8)=324.39$ ,  $p<0.0001$ ,  $\eta_p^2= 0.976$ ; Figure 4a). The percentage of studies that only  
351 included one sex remained constant across years (27% in males, 3% in females;  $p=0.36$ , Cohen's  
352  $d=0.0359$ ) and did not differ across disciplines ( $p=0.34$ , Cohen's  $d=0.932$ ).

353

354 Of the papers that used males and females in an unbalanced design, almost twice more were  
355 skewed towards males (main effect of sex skew:  $F(1,8)=20.23$ ,  $p=0.002$ ,  $\eta_p^2= 0.717$ ) and there were  
356 almost double the percentage of sex-skewed papers in Psychiatry journals compared to  
357 Neuroscience (main effect of discipline  $F(1,8)=9.017$ ,  $p=0.017$ ,  $\eta_p^2= 0.531$ ). There were no other  
358 effects ( $p$ 's  $>0.121$ ); Figure 4b).

359

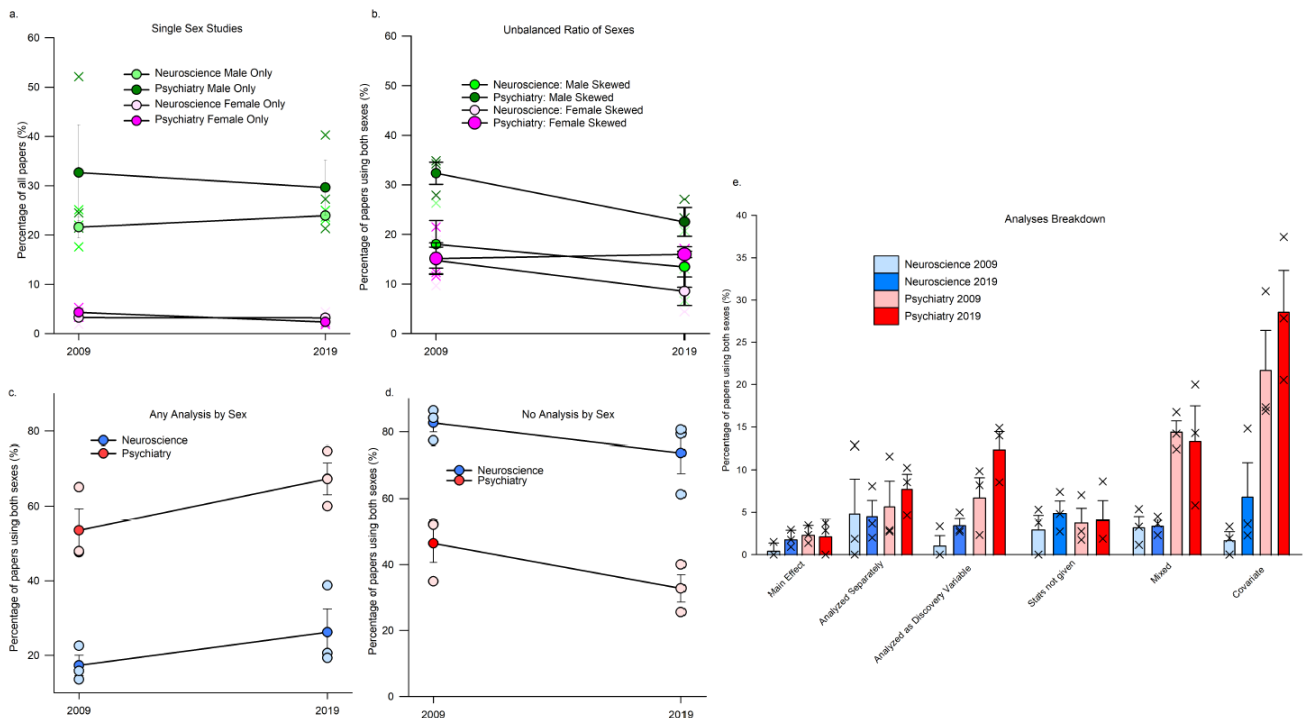

360  
361  
362  
363  
364  
365  
366  
367  
368  
369  
370  
371  
372  
373  
374  
375  
376  
377  
378  
379  
380  
381  
382  
383  
384

Figure 4. (a) Percentage of single sex studies across years and disciplines. Male only studies (26.96%) were 8.4 times higher than female only (3.29%) studies (number of papers: Male only: Neuroscience 2009 n=322, 2019 n=229; Psychiatry 2009 n=184, 2019 n=123; Female only Neuroscience 2009 n=55, 2019 n=35; Psychiatry 2009 n=23, 2019 n=10). (b) Of the studies using an unbalanced ratio of sex, there were more studies with greater proportion of males compared to females (number of papers: Male skew: Neuroscience 2009 n=56, 2019 n=84; Psychiatry 2009 n=97, 2019 n=60; Female skew Neuroscience 2009 n=56, 2019 n=70; Psychiatry 2009 n=51, 2019 n=39). As the percentage is proportionally based on the number of publications that year per journal the number of papers will vary differently than the proportional representation. (c) Breakdown of the type of analyses used by papers that used both sexes. Categories of sex analysis include: main effect of sex, sexes analyzed separately, sex analyzed as a discovery variable, stats not given (i.e. state some analysis was done but did not provide any statistics) mixed (i.e. any combination of analyses which may or may not be consistent throughout the study), and sex as a covariate. Number of papers: main effect: Neuroscience 2009 n=4, 2019 n=12; Psychiatry 2009 n=8, 2019 n=5; sex analyzed separately: Neuroscience 2009 n=9, 2019 n=22; Psychiatry 2009 n=12, 2019 n=19; analyzed as discovery: Neuroscience 2009 n=9, 2019 n=27; Psychiatry 2009 n=24, 2019 n=34; stats not given: Neuroscience 2009 n=11, 2019 n=32; Psychiatry 2009 n=8, 2019 n=7; mixed: Neuroscience 2009 n=5, 2019 n=19; Psychiatry 2009 n=39, 2019 n=38; covariate: Neuroscience 2009 n=6, 2019 n=33; Psychiatry 2009 n=54, 2019 n=75. (d) Majority of papers using both sexes did not analyze by sex, but this decreased slightly over 10 years. Number of papers: Neuroscience 2009 n=270, 2019 n=498; Psychiatry 2009 n=143, 2019 n=76. (e) Any analysis of sex in studies using both sexes. Psychiatry papers were more likely to perform any type of sex analysis than neuroscience papers. Neuroscience 2009 n=46, 2019 n=148; Psychiatry 2009 n=145, 2019 n=173. Means  $\pm$  standard error of the mean.

A thematic analysis on the responses that were given as to why single sex studies were used revealed of 51 documented responses, most referenced the need to reduce variability or confounds (50.98%, Table 3).

| Reason                                     | Proportion    |
|--------------------------------------------|---------------|
| To Reduce Confounds/Variability/Hormones   | 50.98% (n=26) |
| Behaviour (i.e. aggression/fighting)       | 15.69 % (n=8) |
| To Avoid Sex Differences                   | 11.76% (n=6)  |
| Disease Prevalence                         | 11.76% (n=6)  |
| Lack of Previously Observed Sex Difference | 5.88% (n=3)   |
| Insufficient Offspring                     | 3.92% (n=2)   |

385  
386  
387  
388

Table 3. Thematic themes given for only including one sex in study design. 50.98% of single sex studies that gave a reason for the use of one sex referred to the reason to reduce confounds or variability mainly due to fluctuating hormones. N=number of papers

### 389 The majority of papers did not analyze by sex

390  
391  
392

Of the studies that indicated they used both sexes, 40.34% said they analyzed their data by sex. The percentage of papers that indicated they did an analysis by sex increased from by 10% to

393 46.36% in 2019 irrespective of discipline (main effect of year:  $F(1,8)=5.17$ ,  $p=0.05$ ,  $n_p^2= 0.39$ ).  
394 However, Psychiatry papers were three times more likely to have analyzed by sex compared to  
395 Neuroscience papers (main effect of discipline:  $F(1,8)=60.27$ ,  $p<0.0001$ ,  $n_p^2= 0.88$ ). There was no  
396 significant interaction ( $p=0.79$ ; Figure 4c).

397  
398 Overall, whereas the majority of papers indicated they used both sexes, the majority of these  
399 studies did not analyze by sex (58.89%). Neuroscience papers using both sexes were almost twice  
400 more likely to not analyze by sex (78.24%) compared to Psychiatry papers using both sexes  
401 (39.53%;  $F(1,8)= 61.01$ ,  $p<0.001$ ,  $n_p^2= 0.884$ ). Over the years the percentage of papers not  
402 analyzing by sex has significantly decreased by just over 10%, but unfortunately still remains above  
403 50% ( $F(1,8)=5.24$ ,  $p=0.05$ ,  $n_p^2= 0.3955$ ; Figure 4d).

404

#### 405 ***Only 6% of papers that used both sexes analyzed by sex***

406

407 We further broke down how the papers analyzed by sex into 6 categories: complete analysis by sex  
408 (analyzed as a discovery variable), stats not given, covariate, main effect, analyzed separately, and  
409 mixed. Of the papers that used both sexes, 6.00% used sex as a discovery variable. Of the studies  
410 that used both sexes, the largest percentage of studies used sex as a covariate (14.36%) (Figure  
411 4e).

412

413 Psychiatry papers were 5 times more likely to analyze using sex as a covariate ( $p=0.0001$ , Cohen's  
414  $d=2.998$ ) or a mixed analyses ( $p=0.003$ , Cohen's  $d=2.989$ ) compared to Neuroscience papers,  
415 regardless of the year (Analyses Type by Discipline:  $F(5,40)=10.23$ ,  $p<0.001$  or  $p<0.0001$ ,  $n_p^2=$   
416  $0.56$ ). Covariate analyses were more often used than any other analysis ( $p's< 0.001$ ; main effect of  
417 Analysis Type:  $F(5,40)=13.14$ ,  $p<0.0001$ ,  $n_p^2= 0.62$ ). There was also a main effect of Discipline  
418 ( $F(1,8)=60.27$ ,  $p<0.0001$ ,  $n_p^2= 0.88$ ) and a main effect of Year with 2019 being higher than 2009  
419 ( $F(1,8)=5.17$ ,  $p=0.05$ ,  $n_p^2= 0.39$ ), but no other effects ( $p's> 0.43, n_p^2 <0.11$ ).

420

#### 421 ***North American papers increase use of sex in analyses***

422

423 We next examined where papers originated. If we compared the total percentages of country origin  
424 to that percentage that used an optimal analysis for discovery of possible sex differences (Figure 5)  
425 one can see this increased for papers originating in the USA, Canada and a combination of  
426 countries, but fell for papers originating in the EU, Asia, and the UK. We did an analysis across  
427 years using the proportional data based on the number of publications that used both sexes by  
428 country (using each country as its own baseline). There were very low percentages across all  
429 countries with no significant difference across countries ( $p =0.39$ ,  $n_p^2= 0.118$ ) by year or discipline  
430 ( $p's> 0.51$ ,  $n_p^2=<0.10$ ; Figure 5g-j). There were no other significant effects ( $p's>0.05$ ; number of  
431 papers Supplement Table 1).

432

433



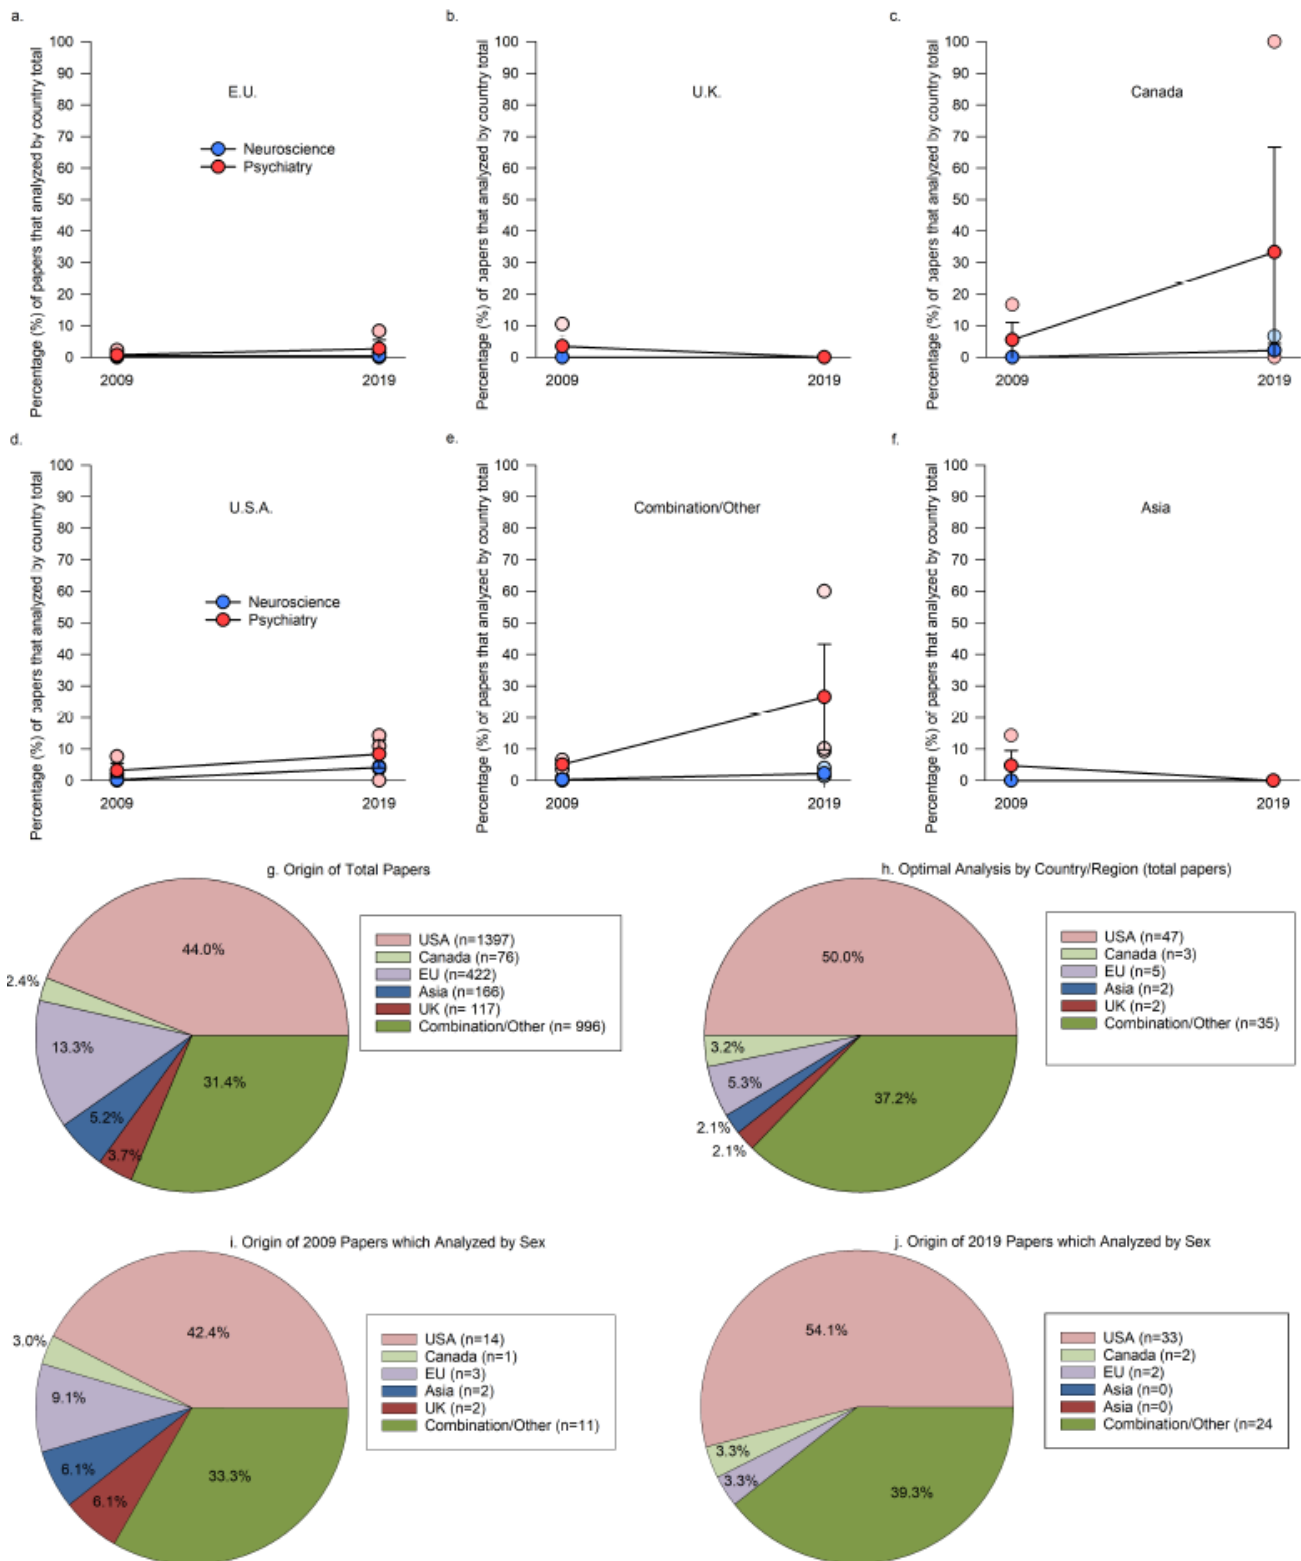

434  
 435 **Figure 5.** (a-f) Each country or combination of countries and their percentage of papers that analyzed using sex as a discovery  
 436 variable across years compared to the country total. Papers originating from the USA, Canada, EU and a combination of countries  
 437 had an increased percentage but none of these were significant. (a) E.U. is the European Union, (b) U.K. is the United Kingdom, (d)  
 438 U.S.A. is the United States of America. (g) Country/region of origin of the paper and (h) breakdown of papers using optimal analysis  
 439 for discovery of sex differences by region. (i-j) Origin of countries which analyzed using sex as a discovery variable compared to the  
 440 total number of papers which analyzed by sex in 2009 (i) and 2019 (j)  
 441

442 ***Females as first or last author increase analysis by sex***

443  
 444 We examined whether sex/gender of the first or last author influenced the percentage of studies that  
 445 used sex as a discovery variable, an optimal design for discovery of possible sex differences, or

446 single sex papers. As these estimates are based on names we take a qualitative approach. Studies  
447 that listed males as first and last authors had a reduced (by 14%) proportion of papers that  
448 considered sex as a discovery variable compared to those that used an optimal design for the  
449 discovery of possible sex differences (Supplement Figure 2a-d). However, having a female as first  
450 author increased the percentage (market share) of papers that used sex as a discovery variable  
451 (increases of 4% with female/female and 10% for female/male). Comparing authorship sex/gender  
452 by male or female only papers (Supplement Figure 2c-d), shows a marginal increase for more  
453 female only papers when females are listed as the last author.

454

## 455 Discussion

456 Our exhaustive survey of 3191 papers across six journals in Neuroscience and Psychiatry revealed  
457 some interesting insights into the inclusion, use, and analyses of both sexes in research over the  
458 ten-year period from 2009 to 2019 (Figure 6). Most studies used males and females in 2019, a 30%  
459 increase from 2009, irrespective of discipline. On the face of it, this is a dramatic positive benefit  
460 arising for greater knowledge and awareness on the importance of sex and gender as variables in  
461 research. However, the way researchers are reporting the use and analyses of males and females  
462 is not optimal for discovery of possible sex differences. This is troubling as collectively science will  
463 lose out on valuable information if researchers are neglecting to embrace the power of studying  
464 potential sex differences. When we determined the percentage of studies that used an optimal  
465 design for discovery of sex differences, the percentage of studies fell to 16.5%, a far cry from most  
466 papers that report the use of both males and females. Of the papers that reported using both sexes,  
467 three quarters of these papers either did not specify sample size, used unequal proportions of the  
468 sexes or used the sexes inconsistently within the paper. Perhaps even more concerning, most  
469 papers that describe using both sexes, did not analyze by sex (58%), and only 6% of studies used  
470 sex as a discovery variable across years and disciplines. Worse yet, the percentage of papers using  
471 optimal designs or analyses for discovery of sex differences has not meaningfully shifted in ten  
472 years across either discipline, despite the number of recent initiatives such as SABV, SGBA and  
473 SAGER. These findings should serve as a wake-up call to researchers, funders and journals, that if  
474 we are to harness the wealth of knowledge from studying both sexes, more needs to be done to  
475 improve the appropriate application of sex in reporting and analyses for discovery.

476

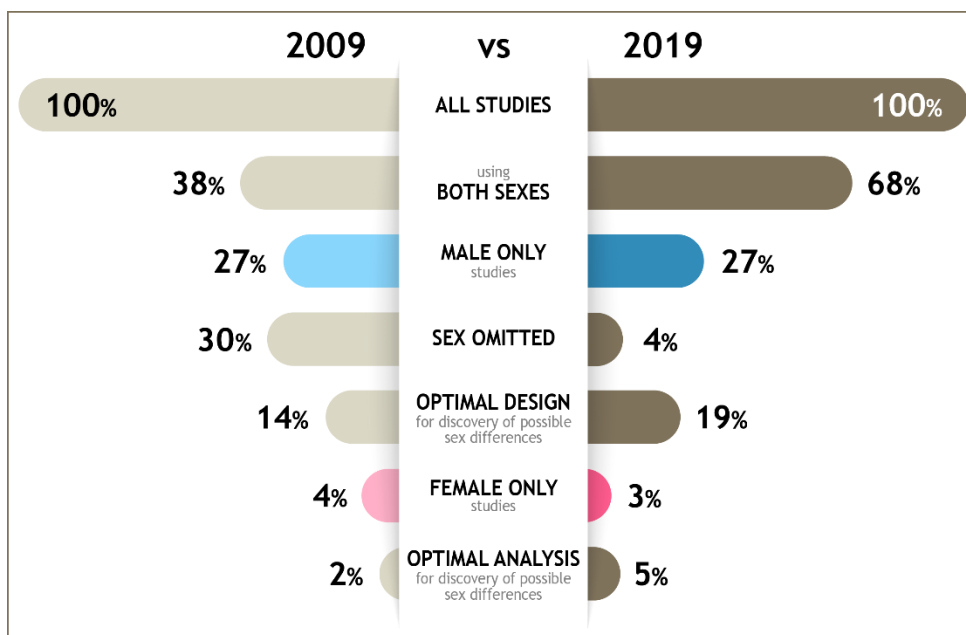

477 **Figure 6.** An infographic depicting the change in percentages of studies from 2009 and 2019 that used both sexes, single sex  
478 studies, studies that used an optimal design or analyses for the discovery of possible sex differences irrespective of discipline.  
479 Optimal design refers to relatively based sample size and use of males and females consistently across the experiments whereas  
480 optimal analyses refers to the use of sex as a discovery variable. Although the percentage of studies in Neuroscience and  
481 Psychiatry has increased dramatically the use of optimal design and analyses has not changed as dramatically and remain and low  
482 levels. There are nine times the percentage of male only compared to female only studies.

483 As noted, there has been a vast increase in the reporting of both sexes in both Psychiatry and  
484 Neuroscience papers from 2009 to 2019 to almost 70% in 2019. Neuroscience showed a 50%  
485 increase in reporting the use of both sexes over the years whereas the increase was 10% in  
486 Psychiatry over the same ten-year period. This difference is likely driven by the majority of papers  
487 using humans in Psychiatry journals, which may be a direct result of an earlier (2001) NIH mandate  
488 to include males and females in clinical research. The great majority of Neuroscience and  
489 Psychiatry articles are using both sexes in 2019, which is encouraging. Our finding of a 50%  
490 increase across ten years is also higher than the almost 20% increase seen from 2010-2014 in  
491 Neuroscience<sup>25</sup> and the 34% increase seen by *Woitowich and colleagues*<sup>24</sup> across the same ten  
492 year period. In addition, the 68% of studies that included males and females in 2019 in our study is  
493 notably higher than the 52% of Neuroscience papers reporting the use of both sexes in 2017<sup>29</sup>,  
494 likely reflecting an upward trend across years. The large progress made in Neuroscience across the  
495 10 years was also noted by *Woitowich*<sup>24</sup> who, as noted, saw an increase to 63% in 2019 using a  
496 sampling of 20 articles from 4 journals, two of which overlapped with ours (*Journal of Neuroscience*  
497 and *Nature Neuroscience*). In the present paper we exhaustively sampled from 3 journals in  
498 Neuroscience, much like the work by *Meitzen and colleagues*<sup>25,29</sup> who exhaustively searched for  
499 Neuroscience papers in 6 journals, 3 of which overlapped with the journals we chose (*Nature*  
500 *Neuroscience*, *Neuron*, *Journal of Neuroscience*). Thus, collectively, multiple studies, using different  
501 journals and methods of sampling, consistently indicate that there is an increasing trend in articles  
502 that include males and females in their work.

503 Although the use of both males and females in research has been steadily increasing to include a  
504 majority of studies, research highlighting or mentioning sex differences is scarce. Why might this  
505 be? We examined whether papers were using optimal designs for discovery of possible sex  
506 differences. When we accounted for studies that did not disclose sample size of the sexes, used  
507 unbalanced design or only used both sexes in a portion of the study, we found that only 16% of  
508 studies used a design that was optimal for discovery of sex differences. Some researchers will  
509 argue that investigating both males and females is only important in the first step and thus the use  
510 of both sexes in further experiments, beyond the initial study is not required. However, there are  
511 numerous examples where a trait may not have sex differences but the mechanisms underlying that  
512 trait do show significant differences between males and females<sup>30-33</sup>. Thus, using males and  
513 females in one experiment does not preclude the fact that they may show differences in further  
514 experiments. Unfortunately, the use of the most advantageous design for discovery of sex  
515 differences was only employed in just under 20% of studies in 2019. Thus, although it appears on  
516 the face of it that most studies are using males and females, the majority of these studies do not  
517 incorporate sex in their design that is optimal for discovery of possible sex differences.

518 Our findings also demonstrated that 25% of studies using both males and females do not report  
519 sample size, consistent with the findings from *Woitowich and colleagues*<sup>24</sup>. Perhaps more  
520 concerning is that particularly in Neuroscience, this trend is increasing over the ten years with  
521 almost 50% of studies not reporting the sample size of males and females used. This trend is  
522 troubling as the reader is unable to judge how effectively males and females were used in the study.

523 As many other researchers have reported, most publications do not analyze by sex. Perhaps more  
524 concerning is that only 6% of studies that used males and females used sex as a discovery variable,  
525 which has not increased effectively over the years. This translates into only 4% of all publications  
526 examined that used sex as a discovery variable. Fourteen percent of papers that used males and  
527 females used sex as a covariate, with this statistical approach used more often in Psychiatry. A  
528 covariate removes the linear association of the factor of sex against the dependent variable,  
529 removing any linear variation due to sex. In our minds this is in opposition to the intention of SABV  
530 or SGBA. The point is not to remove the variation due to sex but to determine whether or not sex is

531 a variable that could be causing differences in outcomes. Others have shown that the use of sex as  
532 a covariate can result in the reduction of power and the loss of important information when a sex  
533 difference is present<sup>34</sup>. Mersha and colleagues<sup>34</sup> show that 26 more single nucleotide  
534 polymorphisms (SNPs) were identified in a sex stratified analysis compared to when sex was used  
535 as a covariate. Put another way, when sex was used as a discovery variable 47 SNPs were  
536 identified that were associated with asthma but if sex was used as a covariate only 21 SNPs were  
537 identified<sup>34</sup>. They also found that effect sizes were larger when a sex-stratified analysis was used,  
538 contrary to popular opinion that power would be negatively affected with the addition of sex as a  
539 discovery variable. Some argue that design and sample sizes are not powered to consider sex-  
540 stratified analyses, but if the sex effects are large, or in opposing directions, the resulting power with  
541 the inclusion of sex, will improve as others have demonstrated<sup>21,28,34-36</sup>. Taken together, our survey  
542 of the literature suggests that researchers are underestimating the power of using sex as a  
543 discovery variable in their research.

544 Similar to other reports in Neuroscience and other biological disciplines<sup>23,25,28,29</sup>, we found female  
545 only studies were a small percentage of studies. Our survey indicated that the percentage of female  
546 only studies is very low at 3%. Our findings are comparable with others showing that 5% of  
547 Neuroscience studies were female only in 2009<sup>28</sup> and in 2017<sup>29</sup>. Although, the use of sex/gender in  
548 studies is important, single-sex studies are still needed. Given the dearth of information on women's  
549 health and disparities in diagnosis<sup>7</sup>, and continued underrepresentation in clinical trials<sup>13</sup>, one could  
550 argue that we need female only studies even more so than male only studies - or that at least the  
551 single sex studies should be conducted and published in equivalent proportions. Indeed the impetus  
552 for SABV and SGBA was instigated in part because of the lack of knowledge of how females  
553 differed in their response to treatments and disease<sup>37</sup>. There are female-specific experiences that  
554 affect female health, such as menstruation, hormonal contraceptives, pregnancy and menopause  
555 that need to be studied<sup>38-41</sup>. Unfortunately, as highlighted by the current study, the percentage of  
556 studies that use only females is devastatingly low and has not improved over ten years. Funders  
557 and researchers should work to correct this imbalance.

558  
559 The rationale for excluding females was often to "reduce variability". To exclude females based on  
560 greater variation than males is not valid, as two studies have found that the variability between  
561 males and females is not different in rodents<sup>42,43</sup>. Although it is common to think that females will  
562 have more variability due to their hormones, males (rodents and primates) and females have diurnal  
563 fluctuations in cortisol/corticosterone<sup>44,45</sup>. Furthermore, human males have diurnal fluctuations in  
564 testosterone levels that vary significantly with age<sup>44</sup>. Researchers are encouraged to consider that  
565 many hormones that can vary with diet, age, housing conditions and experience across both  
566 sexes<sup>46-48</sup>. Thus, variability between males and females should not be a limiting factor in the use of  
567 males and females in research.

568  
569 There have been calls in the literature to ensure that editors and reviewers of manuscripts ensure  
570 that published reports use both males and females and report on outcomes<sup>49</sup>. SAGER guidelines  
571 were developed by the European Association of Science Editors to improve sex and gender in  
572 research reporting in 2016<sup>50</sup>, and indeed, some journals have adopted SAGER guidelines including  
573 over 500 Elsevier journals<sup>51</sup>. Among the guidelines, it is recommended that authors include the sex  
574 in the title and abstract, background information on sex/gender effects on the variables of interest in  
575 the paper and in the results to disaggregate and analyze the data by sex/gender. However, the  
576 percentage of journals that have adopted SAGER are still low with one study finding under 10% of  
577 journals in Psychology had adopted the guidelines and in those journals the guidelines were only  
578 adopted for the title, abstract and methods but not on reporting of analyses or data by sex/gender<sup>52</sup>.  
579 However, as can be seen from the present data, the publishing of this information, particularly with



580 respect to the analyses of sex as a discovery variable is limited, and a more concerted effort needs  
581 to be adopted.

582

583 We only examined three journals for each of the two disciplines, however we did an exhaustive  
584 search of eligible research papers within each journal, culminating in over 3000 articles reviewed.  
585 Contrast this to other papers that surveyed 841 articles across 2 years<sup>24</sup> to over 6000 articles across  
586 4 years<sup>25</sup>. We, as others<sup>25</sup>, selected journals based on ranking by ISI, with some overlap in journals  
587 chosen. However, our exhaustive search of these 6 journals gave values that were not appreciably  
588 different from those that used fewer papers within more journals, or exhaustive searching in a  
589 greater number of years, suggests either survey method yields similar results. Often the terms sex  
590 and gender were used incorrectly. Others have shown that in the fish literature, gender was used  
591 incorrectly 99% of the time<sup>53</sup>. Often gender is conflated with gender identity, and it is important to  
592 understand that gendered effects can be realised when considering a number of intersectional  
593 variables with sex/gender identity<sup>54</sup>. A final consideration is that for biomedical research at NIH, the  
594 SABV consideration was instituted in 2016 and this may not have given enough time to fully realise  
595 the potential in 2019 survey of the literature. However, the fact that in the Neuroscience journals  
596 there was a dramatic increase in the percentage of studies using both males and females to 70%  
597 suggests that there is some movement for inclusion, but this is unfortunately not transferring to  
598 analyses by sex.

599

### 600 ***Call to Action: Fixing Implementation Issues with Carrots and Sticks***

601

602 Given that there is excellent uptake in the use of both males and females in research, what is  
603 driving the lack of optimal design and analyses for discovery of sex differences? It seems possible  
604 that researchers themselves are not aware that they are not using best practices, perhaps due to  
605 the lack of consensus on how to use sex in analyses and the required sample size in the literature<sup>37</sup>.  
606 Three-quarters of researchers say they report the sex in their papers<sup>55</sup>, which matches our data. Of  
607 these researchers, 50% of them said they analysed findings by sex<sup>55</sup> and our results show although  
608 that 40% of researchers analysed by sex in some fashion only 6% used sex as a discovery variable.  
609 Taken together, these data indicate that researchers may be considering analyses that are  
610 suboptimal or not reporting analyses even when they have done them. Another concerning factor,  
611 was that while researchers indicated they had a good knowledge of SABV they incorrectly used sex  
612 and gender in discussing their views, indicating a lack of knowledge. Thus, it is possible that  
613 researchers believe that the addition of both sexes without thorough analyses is enough to satisfy  
614 the initiatives. Another outcome of the qualitative analyses, that perhaps should not come as a  
615 surprise, is that some researchers do not appreciate mandates<sup>56</sup>.

616

617 One could argue that the mandates do not go far enough and are limited to a few agencies in the  
618 EU, Canada, and the US. There are also no repercussions when authors do not publish or analyse  
619 by sex. Indeed, NIH funding did not significantly affect the percentage of studies that analysed by  
620 sex (included covariate) with a net increase of just 3% (to 9%) overall<sup>29</sup>. Our data indicate that there  
621 is a non-significant increase in studies that used sex as a discovery variable in the US, Canada, and  
622 the EU pointing to an overall benefit of the current mandates that exist in those countries. However,  
623 it is important to underscore that these were still low percentages and that there are no reporting  
624 requirements from these funding agencies.

625

626 What can funders do to promote more work on sex differences? One solution is to have funding  
627 dedicated specifically for SABV and SGBA proposals. Evidence suggests that this approach has  
628 been successful in cardiovascular research. The American Heart Association (US) has dedicated  
629 funding for sex differences and as a result sex and gender based research and analyses in

630 cardiovascular disease has flourished<sup>57</sup>. To undertake a seismic shift, funders would make these  
631 funds a significant portion of the budget to provide enough incentive to entice researchers to think  
632 deeply about incorporation of sex in research. Dedicated funding would not only generate proposals  
633 and knowledge dedicated to the analyses of sex differences, but they would also have the by-  
634 product of creating the next generation of researchers that integrate sex into their research. One  
635 can also look at how significant funding to Amyotrophic lateral sclerosis (ALS) and AIDS advanced  
636 research in these areas. In 2014, the ice bucket challenge raised greater than \$115M in the US and  
637 this attention leveraged dedicated funding from other sources tripling ALS research budgets in 5  
638 years<sup>58</sup>. This bolus of funding doubled the number of ALS publications, led to a 50% increase in  
639 investigators interested in ALS, and has dramatically accelerated the number of clinical trials in  
640 ALS<sup>59</sup>. Scientific evidence takes time to build, but fruits of discovery with the increased funding are  
641 paying off with promising new treatments<sup>60</sup>. It's hard not to get excited about the possibilities if this  
642 type of funding is extended to fill the sex disparities in health research. AIDS research is another  
643 success story with dramatic advancements in AIDS research that came with dedicated funding.  
644 AIDS research funding increased dramatically over the years to >18B<sup>61</sup>. With these dedicated funds  
645 have come advancements in therapeutics such that individuals with HIV can live relatively full  
646 lives<sup>62</sup>. To make significant progress, funders need to have dedicated funding for SABV/SGBA  
647 which would have a cascading effect to get more researchers interested in SABV/SGBA, ensure  
648 consideration of sex/gender as a discovery variable, increase the number of discoveries and train  
649 the next generation of SABV/SGBA researchers.

650  
651 What can publishers do to promote publications using sex-based analyses? When journals adopt  
652 SAGER guidelines, it is up to the authors, reviewers and editors to ensure the guidelines are met. In  
653 over a third of submissions to a neuroendocrinology journal, authors and reviewers failed to notice  
654 that sex/gender had not been disclosed<sup>63</sup>. This suggests, not surprisingly, that not every researcher  
655 is triggered to think about the consideration of sex in experimental design and analyses. Training  
656 modules will help, but working on a similar premise as above, enticing researchers to explore the  
657 influence of sex/gender in their data may be a more fruitful approach. If journals, especially those  
658 with higher visibility, adopt calls for papers using sex and gender-based analyses this will serve as a  
659 catalyst to ensure more researchers consider possible sex differences and further promote the  
660 notion that this research is important to publish.

661  
662 Lastly, our data are suggestive that countries that have adopted mandates for inclusion of sexes in  
663 research have a small positive effect to increase analyses by sex as a discovery variable.  
664 Compared to the country norms, papers originating from the US, Canada or a combination of  
665 countries had greater representation in using sex as a discovery variable. In addition, female first or  
666 last authors increases the use and analyses of both sexes in research<sup>64,65</sup> which is consistent with  
667 our own data. Recently, there has been concerted efforts to promote diversity in science<sup>66</sup> and these  
668 findings suggest that increasing sex/gender diversity in science is another fruitful pathway to  
669 improve the percentage of studies exploring sex as a discovery factor in analyses.

670  
671 We hope these data are a wakeup call to the research community to not only include males and  
672 females in their research but to ensure appropriate methods of integration and analyses. If  
673 researchers are merely sprinkling in a few animals of the opposite sex in one of many experiments  
674 this will not allow for discovery of the impact of sex as a biological variable. Nor will the non-robust  
675 adoption of sex in experiments harness the additional power that the analyses of sex can afford<sup>34</sup>.  
676 Research shows us that the use of sex as a discovery variable can lead to fruitful knowledge, and  
677 can conclude that the different mechanisms between males and females require distinct treatment<sup>21</sup>.  
678 Indeed, inclusion of sex in analyses and design will improve not only the health of females but of  
679 males<sup>67</sup>. We lose collectively, not just in knowledge gained, but also in our search of more effective



680 treatments when sex is not considered in the design and analyses of our studies. We call on  
681 funders, reviewers and researchers to recognize that sex and gender matter across all disciplines.  
682 The community needs to be aware that there are many types of sex differences<sup>19,68</sup> and that some  
683 sex differences are revealed due to perturbations in environment, genotype, or disease<sup>19,69,70</sup> so it is  
684 important to continually examine and analyze both sexes throughout the studies. It is imperative that  
685 more attention is paid to the appropriate design and analyses of sex/gender in the literature. We  
686 need to study how mandates can improve adherence in both study design and dissemination. To  
687 ensure precision medicine, we need the community of funders, researchers and publishers to  
688 embrace the addition of SABV, SGBA and SAGER to improve the health of women, men and  
689 gender-diverse individuals.

690

### 691 **Acknowledgements**

692 This research was funded by a Natural Sciences and Engineering Research Council of Canada  
693 grant to LAMG (2018-04301) and supported by the BC Women's Foundation.

694

### 695 **Author Contributions**

696 RKR and TFLS collated and tabulated the data with consultation with LAMG and AA. TEH, AA, and  
697 LAMG carried out the analysis. RKR, TFLS and LAMG wrote the manuscript. LAMG supervised the  
698 work. All authors declare no competing interests.

699

700 **REFERENCES**

- 701
- 702 1. Mauvais-Jarvis, F. *et al.* Sex and gender: modifiers of health, disease, and medicine. *The*
- 703 *Lancet* **396**, 565–582 (2020).
- 704 2. Irvine, K., Laws, K. R., Gale, T. M. & Kondel, T. K. Greater cognitive deterioration in women
- 705 than men with Alzheimer’s disease: A meta analysis. *J. Clin. Exp. Neuropsychol.* **34**, 989–998
- 706 (2012).
- 707 3. Eid, R. S., Gobinath, A. R. & Galea, L. A. M. Sex differences in depression: Insights from clinical
- 708 and preclinical studies. *Prog. Neurobiol.* **176**, 86–102 (2019).
- 709 4. Golden, L. C. & Voskuhl, R. The importance of studying sex differences in disease: The
- 710 example of multiple sclerosis. *J. Neurosci. Res.* **95**, 633–643 (2017).
- 711 5. Häfner, H., Riecher-Rössler, A., Maurer, K., Fätkenheuer, B. & Löffler, W. First onset and early
- 712 symptomatology of schizophrenia. A chapter of epidemiological and neurobiological research
- 713 into age and sex differences. *Eur. Arch. Psychiatry Clin. Neurosci.* **242**, 109–118 (1992).
- 714 6. Liu, K. A. & Mager, N. A. D. Women’s involvement in clinical trials: historical perspective and
- 715 future implications. *Pharm. Pract.* **14**, 708 (2016).
- 716 7. Westergaard, D., Moseley, P., Sørup, F. K. H., Baldi, P. & Brunak, S. Population-wide analysis
- 717 of differences in disease progression patterns in men and women. *Nat. Commun.* **10**, 666
- 718 (2019).
- 719 8. Fischinger, S., Boudreau, C. M., Butler, A. L., Streeck, H. & Alter, G. Sex differences in vaccine-
- 720 induced humoral immunity. *Semin. Immunopathol.* **41**, 239–249 (2019).
- 721 9. Zucker, I. & Prendergast, B. J. Sex differences in pharmacokinetics predict adverse drug
- 722 reactions in women. *Biol. Sex Differ.* **11**, 32 (2020).
- 723 10. Trutter, L., Bigeh, A., Pecci, C., Muzaffar, M. & Gulati, M. Diagnostic and Management
- 724 Dilemmas in Women Presenting with Acute Coronary Syndromes. *Curr. Cardiol. Rep.* **22**, 163
- 725 (2020).
- 726 11. Lee, S. K. Sex as an important biological variable in biomedical research. *BMB Rep.* **51**, 167–
- 727 173 (2018).
- 728 12. Yakerson, A. Women in clinical trials: a review of policy development and health equity in the
- 729 Canadian context. *Int. J. Equity Health* **18**, 56 (2019).

- 730 13. Geller, S. E. *et al.* The More Things Change, the More They Stay the Same: A Study to  
731 Evaluate Compliance With Inclusion and Assessment of Women and Minorities in Randomized  
732 Controlled Trials. *Acad. Med. J. Assoc. Am. Med. Coll.* **93**, 630–635 (2018).
- 733 14. Clayton, J. A. & Collins, F. S. NIH to balance sex in cell and animal studies. **509**, 282–283  
734 (2014).
- 735 15. Mazure, C. M. & Jones, D. P. Twenty years and still counting: including women as participants  
736 and studying sex and gender in biomedical research. *BMC Womens Health* **15**, 94 (2015).
- 737 16. Tannenbaum, C., Schwarz, J. M., Clayton, J. A., de Vries, G. J. & Sullivan, C. Evaluating sex as  
738 a biological variable in preclinical research: the devil in the details. *Biol. Sex Differ.* **7**, 13 (2016).
- 739 17. Klinge, I. Best Practices in the Study of Gender. In C. Gibson and LAM Galea (Eds) *Sex*  
740 *Differences in Brain Function and Dysfunction. Current Topics in Behavioral Neurosciences.* vol.  
741 52 (Springer, Cham, in press).
- 742 18. Miller, L. R. *et al.* Considering sex as a biological variable in preclinical research. *FASEB J. Off.*  
743 *Publ. Fed. Am. Soc. Exp. Biol.* **31**, 29–34 (2017).
- 744 19. McCarthy, M. M., Arnold, A. P., Ball, G. F., Blaustein, J. D. & De Vries, Geert. J. Sex Differences  
745 in the Brain: The Not So Inconvenient Truth. *J. Neurosci.* **32**, 2241–2247 (2012).
- 746 20. Shansky, R. M. & Woolley, C. S. Considering Sex as a Biological Variable Will Be Valuable for  
747 Neuroscience Research. *J. Neurosci. Off. J. Soc. Neurosci.* **36**, 11817–11822 (2016).
- 748 21. Galea, L. A. M., Choleris, E., Albert, A. Y. K., McCarthy, M. M. & Sohrabji, F. The promises and  
749 pitfalls of sex difference research. *Front. Neuroendocrinol.* **56**, 100817 (2020).
- 750 22. Woitowich, N. C. & Woodruff, T. K. Implementation of the NIH Sex-Inclusion Policy: Attitudes  
751 and Opinions of Study Section Members. *J. Womens Health 2002* **28**, 9–16 (2019).
- 752 23. Beery, A. K. & Zucker, I. Sex bias in neuroscience and biomedical research. *Neurosci.*  
753 *Biobehav. Rev.* **35**, 565–572 (2011).
- 754 24. Woitowich, N. C., Beery, A. & Woodruff, T. A 10-year follow-up study of sex inclusion in the  
755 biological sciences. *eLife* **9**, e56344 (2020).
- 756 25. Will, T. R. *et al.* Problems and Progress regarding Sex Bias and Omission in Neuroscience  
757 Research. *eNeuro* **4**, ENEURO.0278-17.2017 (2017).

- 758 26. Shah, K., McCormack, C. E. & Bradbury, N. A. Do you know the sex of your cells? *Am. J.*  
759 *Physiol. - Cell Physiol.* **306**, C3–C18 (2014).
- 760 27. Murphy, K. R., Myers, B. & Wolach, A. *Statistical power analysis: A simple and general model*  
761 *for traditional and modern hypothesis tests, 4th ed.* xiv, 229 (Routledge/Taylor & Francis Group,  
762 2014).
- 763 28. Beery, A. K. Inclusion of females does not increase variability in rodent research studies. *Curr.*  
764 *Opin. Behav. Sci.* **23**, 143–149 (2018).
- 765 29. Mamlouk, G. M., Dorris, D. M., Barrett, L. R. & Meitzen, J. Sex bias and omission in  
766 neuroscience research is influenced by research model and journal, but not reported NIH  
767 funding. *Front. Neuroendocrinol.* **57**, 100835 (2020).
- 768 30. Oberlander, J. G. & Woolley, C. S. 17 $\beta$ -Estradiol Acutely Potentiates Glutamatergic Synaptic  
769 Transmission in the Hippocampus through Distinct Mechanisms in Males and Females. *J.*  
770 *Neurosci. Off. J. Soc. Neurosci.* **36**, 2677–2690 (2016).
- 771 31. Sorge, R. E. *et al.* Different immune cells mediate mechanical pain hypersensitivity in male and  
772 female mice. *Nat. Neurosci.* **18**, 1081–1083 (2015).
- 773 32. Wickens, M. M., Kirkland, J. M., Knouse, M. C., McGrath, A. G. & Briand, L. A. Sex-specific role  
774 for prefrontal cortical protein interacting with C kinase 1 in cue-induced cocaine seeking. *Addict.*  
775 *Biol.* **26**, e13051 (2021).
- 776 33. Yagi, S. *et al.* Sex Differences in Maturation and Attrition of Adult Neurogenesis in the  
777 Hippocampus. *eNeuro* **7**, (2020).
- 778 34. Mersha, T. B. *et al.* Genomic architecture of asthma differs by sex. *Genomics* **106**, 15–22  
779 (2015).
- 780 35. Buch, T. *et al.* Benefits of a factorial design focusing on inclusion of female and male animals in  
781 one experiment. *J. Mol. Med.* **97**, 871–877 (2019).
- 782 36. Hyatt, C. S. *et al.* The quandary of covarying: A brief review and empirical examination of  
783 covariate use in structural neuroimaging studies on psychological variables. *NeuroImage* **205**,  
784 116225 (2020).

- 785 37. White, J., Tannenbaum, C., Klinge, I., Schiebinger, L. & Clayton, J. The Integration of Sex and  
786 Gender Considerations Into Biomedical Research: Lessons From International Funding  
787 Agencies. *J. Clin. Endocrinol. Metab.* **106**, 3034–3048 (2021).
- 788 38. Galea, L. A., Qiu, W. & Duarte-Guterman, P. Beyond sex differences: short and long-term  
789 implications of motherhood on women’s health. *Curr. Opin. Physiol.* **6**, 82–88 (2018).
- 790 39. Grandi, S. M. *et al.* Cardiovascular Disease-Related Morbidity and Mortality in Women With a  
791 History of Pregnancy Complications. *Circulation* **139**, 1069–1079 (2019).
- 792 40. Lewis, C. A. *et al.* Effects of Hormonal Contraceptives on Mood: A Focus on Emotion  
793 Recognition and Reactivity, Reward Processing, and Stress Response. *Curr. Psychiatry Rep.*  
794 **21**, 115 (2019).
- 795 41. Roeder, H. J. & Leira, E. C. Effects of the Menstrual Cycle on Neurological Disorders. *Curr.*  
796 *Neurol. Neurosci. Rep.* **21**, 34 (2021).
- 797 42. Prendergast, B. J., Onishi, K. G. & Zucker, I. Female mice liberated for inclusion in  
798 neuroscience and biomedical research. *Neurosci. Biobehav. Rev.* **40**, 1–5 (2014).
- 799 43. Becker, J. B., Prendergast, B. J. & Liang, J. W. Female rats are not more variable than male  
800 rats: a meta-analysis of neuroscience studies. *Biol. Sex Differ.* **7**, 34 (2016).
- 801 44. Harden, K. P. *et al.* Diurnal coupling between testosterone and cortisol from adolescence to  
802 older adulthood. *Psychoneuroendocrinology* **73**, 79–90 (2016).
- 803 45. Verma, P., Hellems, K. G. C., Choi, F. Y., Yu, W. & Weinberg, J. Circadian phase and sex  
804 effects on depressive/anxiety-like behaviors and HPA axis responses to acute stress. *Physiol.*  
805 *Behav.* **99**, 276–285 (2010).
- 806 46. Westenbroek, C., Den Boer, J. A., Veenhuis, M. & Ter Horst, G. J. Chronic stress and social  
807 housing differentially affect neurogenesis in male and female rats. *Brain Res. Bull.* **64**, 303–308  
808 (2004).
- 809 47. Grégoire, C.-A., Bonenfant, D., Le Nguyen, A., Aumont, A. & Fernandes, K. J. L. Untangling the  
810 influences of voluntary running, environmental complexity, social housing and stress on adult  
811 hippocampal neurogenesis. *PloS One* **9**, e86237 (2014).
- 812 48. Moser, V. A. *et al.* Effects of aging, high-fat diet, and testosterone treatment on neural and  
813 metabolic outcomes in male brown Norway rats. *Neurobiol. Aging* **73**, 145–160 (2019).

- 814 49. Shansky, R. M. & Murphy, A. Z. Considering sex as a biological variable will require a global  
815 shift in science culture. *Nat. Neurosci.* **24**, 457–464 (2021).
- 816 50. Heidari, S., Babor, T. F., De Castro, P., Tort, S. & Curno, M. Sex and Gender Equity in  
817 Research: rationale for the SAGER guidelines and recommended use. *Res. Integr. Peer Rev.* **1**,  
818 2 (2016).
- 819 51. Miles, J. The importance of sex and gender reporting. *Elsevier Connect*  
820 <https://www.elsevier.com/connect/editors-update/the-importance-of-sex-and-gender-reporting>  
821 (2020).
- 822 52. Cavanaugh, C. & Abu Hussein, Y. Do journals instruct authors to address sex and gender in  
823 psychological science? *Res. Integr. Peer Rev.* **5**, 14 (2020).
- 824 53. Ogle, D. H. & Schanning, K. F. Usage of “Sex” and “Gender”. *Fisheries* **37**, 271–272 (2012).
- 825 54. Rich-Edwards, J. W., Kaiser, U. B., Chen, G. L., Manson, J. E. & Goldstein, J. M. Sex and  
826 Gender Differences Research Design for Basic, Clinical, and Population Studies: Essentials for  
827 Investigators. *Endocr. Rev.* **39**, 424–439 (2018).
- 828 55. Waltz, M., Saylor, K. W., Fisher, J. A. & Walker, R. L. Biomedical Researchers’ Perceptions of  
829 the NIH’s Sex as a Biological Variable Policy for Animal Research: Results from a U.S. National  
830 Survey. *J. Womens Health 2002* **30**, 1395–1405 (2021).
- 831 56. Waltz, M., Fisher, J. A., Lyerly, A. D. & Walker, R. L. Evaluating the National Institutes of  
832 Health’s Sex as a Biological Variable Policy: Conflicting Accounts from the Front Lines of Animal  
833 Research. *J. Womens Health 2002* **30**, 348–354 (2021).
- 834 57. Mosca, L., Barrett-Connor, E. & Wenger, N. K. Sex/gender differences in cardiovascular disease  
835 prevention: what a difference a decade makes. *Circulation* **124**, 2145–2154 (2011).
- 836 58. Brian Frederick. Ice Bucket Challenge dramatically accelerated the fight against ALS. *The ALS*  
837 *Association* [https://www.als.org/stories-news/ice-bucket-challenge-dramatically-accelerated-](https://www.als.org/stories-news/ice-bucket-challenge-dramatically-accelerated-fight-against-als)  
838 [fight-against-als.](https://www.als.org/stories-news/ice-bucket-challenge-dramatically-accelerated-fight-against-als)
- 839 59. ALS Association. EVALUATION OF THE ALS ASSOCIATION GRANT PROGRAMS.  
840 <https://www.als.org/sites/default/files/2020-06/RTI-Report-FINAL.pdf> (2019).
- 841 60. McDermott, C. J. Clinical trials in amyotrophic lateral sclerosis. *Curr. Opin. Neurol.* **32**, 758–763  
842 (2019).



- 843 61. KFF. U.S. Federal Funding for HIV/AIDS: Trends Over Time. *KFF*  
844 <https://www.kff.org/hiv/aids/fact-sheet/u-s-federal-funding-for-hiv/aids-trends-over-time/> (2019).
- 845 62. Samji, H. *et al.* Closing the gap: increases in life expectancy among treated HIV-positive  
846 individuals in the United States and Canada. *PloS One* **8**, e81355 (2013).
- 847 63. Galea, L. A. M. Chasing red herrings and wild geese: Sex differences versus sex dimorphism.  
848 *Front. Neuroendocrinol.* **63**, 100940 (2021).
- 849 64. Labinaz, A. *et al.* Female Authorship in Preclinical Cardiovascular Research: Temporal Trends  
850 and Influence on Experimental Design. *JACC Basic Transl. Sci.* **4**, 471–477 (2019).
- 851 65. Nielsen, M. W., Andersen, J. P., Schiebinger, L. & Schneider, J. W. One and a half million  
852 medical papers reveal a link between author gender and attention to gender and sex analysis.  
853 *Nat. Hum. Behav.* **1**, 791–796 (2017).
- 854 66. Forrester, N. Diversity in science: next steps for research group leaders. *Nature* **585**, S65–S67  
855 (2020).
- 856 67. Cahill, L. & Hall, E. D. Is it time to resurrect “lazaroids”? *J. Neurosci. Res.* **95**, 17–20 (2017).
- 857 68. Becker, J. B. & Koob, G. F. Sex Differences in Animal Models: Focus on Addiction. *Pharmacol.*  
858 *Rev.* **68**, 242–263 (2016).
- 859 69. Gobinath, A. R., Choleris, E. & Galea, L. A. M. Sex, hormones, and genotype interact to  
860 influence psychiatric disease, treatment, and behavioral research. *J. Neurosci. Res.* **95**, 50–64  
861 (2017).
- 862 70. Rubinow, D. R. & Schmidt, P. J. Sex differences and the neurobiology of affective disorders.  
863 *Neuropsychopharmacology* **44**, 111–128 (2019).
- 864
